# Supplementary material
Source: Research Square preprint supplement (doi:10.21203/rs.3.rs-9236031/v1)
Supplement: Supplementary file 1 [file 28eff1e0b01c6019c1d83221.docx]

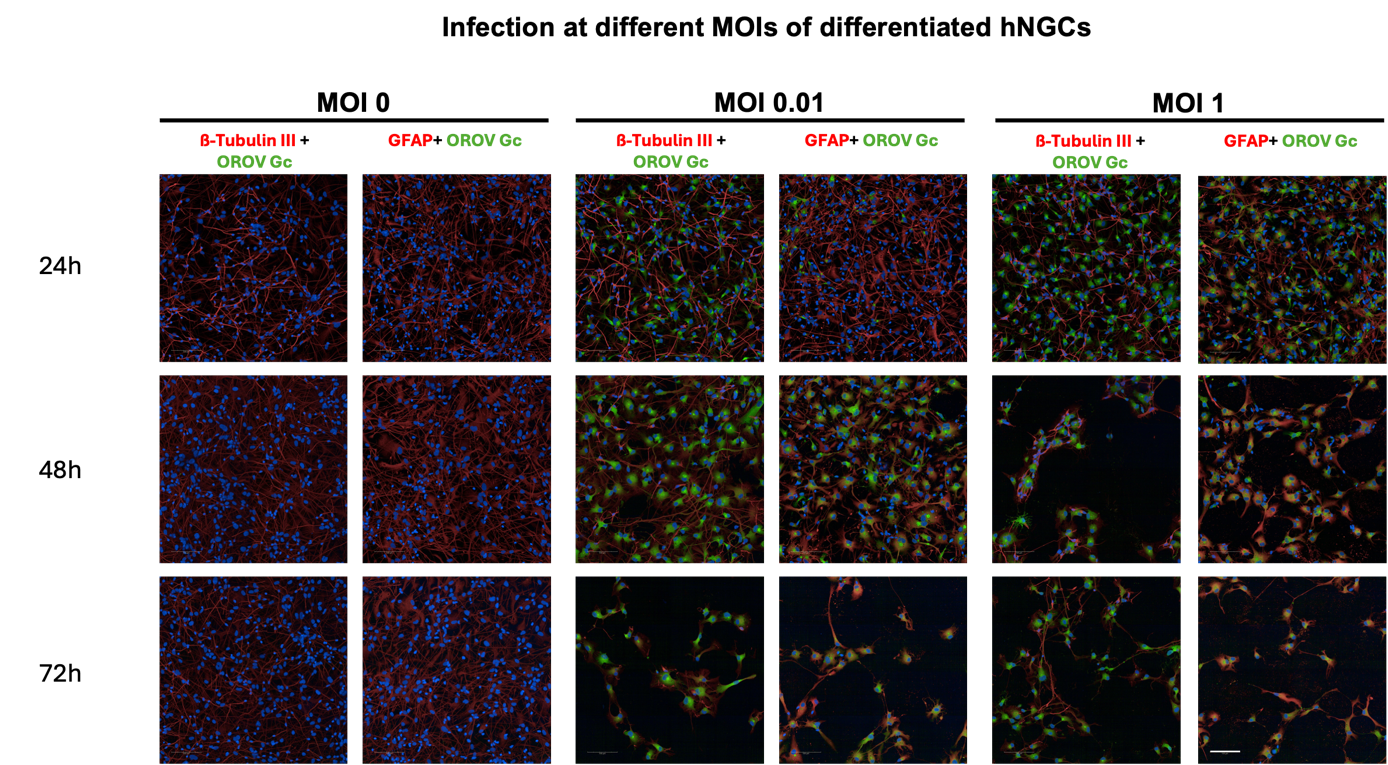
**Supplementary figure 1 :** Immunolabelling with anti-Gc (OROV), anti-ß-III-Tubulin and/or anti-GFAP antibodies. Scale Bar represents: 100µm.
